## Response to Invited Commentary

### Aggio et al. Respond to “Lessons for Research on Cognitive Aging”

Daniel Aggio\*, Lee Smith, Abigail Fisher, and Mark Hamer

\* Correspondence to: Daniel Aggio, Health Behaviour Research Centre, University College London, 1-19 Torrington Place, WC1E 6BT London, United Kingdom (e-mail: d.aggio@ucl.ac.uk).

Initially submitted February 9, 2016; accepted for publication February 11, 2016.

We thank Dr. Belsky (1) for his interest in our study (2), in which we investigated associations between physical activity and cognitive function in young people. He raises several important issues on the role of physical activity as a public health strategy in the prevention of cognitive decline. The issue of “neuroselection,” wherein individuals with better cognitive function are more likely to engage in healthy behaviors such as physical activity and refrain from unhealthy ones such as smoking, is a potential source of bias in observational studies. The alternative hypothesis is that of “neuroprotection,” in which engagement in healthy behaviors is likely to lead to enhanced cognitive development.

We agree that confounding by pre-existing characteristics is a general problem in any epidemiologic work. Indeed, the children in our accelerometry sample typically came from wealthier families and had parents with higher levels of education than did those excluded from the analysis. Neuroselection may also explain the associations observed between physical activity and cognitive function. Longitudinal studies provide an opportunity to investigate whether cognitive function at baseline is associated with positive health behaviors in later life. For example, children with better cognitive function demonstrate higher fitness levels in adulthood (3). One potential mechanism may be that individuals with superior cognitive function are better able to interpret and respond to health advice than are individuals with lower cognitive function (4).

The basis of the neuroselection hypothesis is that individuals with higher cognitive function elect to live healthier lives. However, in our study (2), physical activity was measured at age 7 years, meaning that if the neuroselection argument were true, children with higher cognitive function would already be selecting to be active at this early age. Children’s knowledge of healthy behaviors is limited in this age group (5), which suggests that young children may not be able to correctly identify healthy behaviors regardless of cognitive ability. Moreover, during early childhood, self-selection of healthy behaviors may be restricted because of the low levels of autonomy due

to school policy and parental restrictions. Physical activity at this age is predominantly influenced by parents and the school environment (6, 7). Therefore, participation in healthy behaviors among young children is largely determined by their parents’ and teachers’ decisions rather than their own. Adolescents and young adults have high levels of independence and therefore the ability to respond to new information independently. Together, these points suggest that the process of neuroselection is more likely to occur from adolescence onwards than in childhood. Further longitudinal studies with multiple repeated measures of health behaviors and cognitive function throughout childhood and adolescence are needed to address this hypothesis.

Dr. Belsky raises an important point relating to the inconsistent effects of exercise on cognitive function that have been observed in recent randomized trials. This suggests that successful interventions may need to utilize physical activity in ways that also engage the brain. Indeed, this also emphasizes the main finding from our study, which was the importance of the context of physical activity and sedentary behavior in their associations with cognitive function. There is also research demonstrating the importance of context on other health outcomes. Notably, in a recent prospective study, childhood membership in a club was associated with a lower risk of mortality in adulthood that was independent of physical activity levels (8).

In summary, physical activity is a potential public health strategy for the prevention of neurodegenerative diseases, and early life may represent a crucial period for intervention. Further investigation on effects of specific types and domains of activity is warranted.

#### ACKNOWLEDGMENTS

Author affiliations: Health Behaviour Research Centre, University College London, London, United Kingdom (Daniel Aggio, Lee Smith, Abigail Fisher); Physical Activity Research

Group, University College London, London, United Kingdom (Daniel Aggio, Lee Smith, Mark Hamer); The Cambridge Centre for Sport and Exercise Sciences, Department of Life Sciences, Anglia Ruskin University, Cambridge, United Kingdom (Lee Smith); National Centre for Sport and Exercise Medicine, Loughborough University (Mark Hamer); and National Institute for Health Research Leicester-Loughborough Diet, Lifestyle and Physical Activity Biomedical Research Unit, Leicester, United Kingdom (Mark Hamer).

This study is supported through a grant from the Economic Social Research Council (grant ES/M003795/1). L.S. is supported by the National Institute for Health Research's School for Public Health Research. A.F. is supported by a Cancer Research UK programme grant (C1418/A141). M.H. is supported by the British Heart Foundation (grant RE/10/005/28296).

Conflict of interest: none declared.

## REFERENCES

1. Belsky DW. Invited commentary: lessons for research on cognitive aging from a study of children. *Am J Epidemiol.* 2016; 183(12):1083–1085.
2. Aggio D, Smith L, Fisher A, et al. Context-specific associations of physical activity and sedentary behavior with cognition in children. *Am J Epidemiol.* 2016;183(12):1075–1082.
3. Belsky DW, Caspi A, Israel S, et al. Cardiorespiratory fitness and cognitive function in midlife: neuroprotection or neuroselection? *Ann Neurol.* 2015;77(4):607–617.
4. Taylor MD, Hart CL, Davey Smith G, et al. Childhood mental ability and smoking cessation in adulthood: prospective observational study linking the Scottish Mental Survey 1932 and the Midspan studies. *J Epidemiol Community Health.* 2003; 57(6):464–465.
5. Normandeau S, Kalnins I, Jutras S, et al. A description of 5- to 12-year old children's conception of health within the context of their daily life. *Psychol Health.* 1998;13(5):883–896.
6. Yao CA, Rhodes RE. Parental correlates in child and adolescent physical activity: a meta-analysis. *Int J Behav Nutr Phys Act.* 2015;12:10.
7. Morton KL, Atkin AJ, Corder K, et al. The school environment and adolescent physical activity and sedentary behaviour: a mixed-studies systematic review. *Obes Rev.* 2016;17(2): 142–158.
8. Calvin CM, Batty GD, Brett CE, et al. Childhood club participation and all-cause mortality in adulthood: a 65-year follow-up study of a population-representative sample in Scotland. *Psychosom Med.* 2015;77(7):712–720.
